# Supplementary material for: Optimisation of a Microfluidic Method for the Delivery of a Small Peptide
Source: MDPI journal article supplement (doi:10.3390/pharmaceutics13091505), 2021-09-18
Supplement: s1 [file s1]

# Supplementary Materials: Optimisation of a Microfluidic Method for the Delivery of a Small Peptide

Felicity Y. Han, Weizhi Xu, Vinod Kumar, Cedric S. Cui, Xaria Li, Xingyu Jiang, Trent M. Woodruff, Andrew K. Whittaker, and Maree T. Smith

**Table S1.** Formulations of peptide-loaded lipid shell-PLGA core nanoparticles.

| No. | Organic solvent | Polymer (conc.% w/v)  | Drug loading (% w/w) | Flow rate (mL/h, water/polymer) | Size (mean $\pm$ SEM) | PDI (mean $\pm$ SEM) |
|-----|-----------------|-----------------------|----------------------|---------------------------------|-----------------------|----------------------|
| M1  | DCM             | 1% PLGA               | 0                    | 60/4.5                          | 412.1 $\pm$ 43.5      | 0.78 $\pm$ 0.14      |
| M2  | DCM             | 1% PLGA               | 0                    | 120/3                           | 247.0 $\pm$ 26.9      | 0.63 $\pm$ 0.09      |
| M3  | DCM             | 1% PLGA               | 0                    | 120/1                           | 151.9 $\pm$ 4.8       | 0.34 $\pm$ 0.08      |
| M4  | ACN             | 1% PLGA               | 0                    | 60/4.5                          | 181.9 $\pm$ 8.6       | 0.25 $\pm$ 0.02      |
| M5  | ACN             | 1% PLGA               | 0                    | 120/3                           | 127.0 $\pm$ 8.1       | 0.20 $\pm$ 0.03      |
| M6  | ACN             | 1% PLGA               | 0                    | 120/1                           | 89.9 $\pm$ 4.3        | 0.22 $\pm$ 0.01      |
| M7  | THF+DMF (3:7)   | 1% PLGA               | 0                    | 60/4.5                          | 235.4 $\pm$ 7.8       | 0.48 $\pm$ 0.01      |
| M8  | THF+DMF (3:7)   | 1% PLGA               | 0                    | 120/3                           | 152.7 $\pm$ 4.1       | 0.31 $\pm$ 0.01      |
| M9  | THF+DMF (3:7)   | 1% PLGA               | 0                    | 120/1                           | 34.4 $\pm$ 1.8        | 0.30 $\pm$ 0.04      |
| M10 | EA              | 1% PLGA               | 0                    | 60/4.5                          | 321.2 $\pm$ 45.1      | 0.50 $\pm$ 0.14      |
| M11 | EA              | 1% PLGA               | 0                    | 120/3                           | 241.8 $\pm$ 16.7      | 0.35 $\pm$ 0.24      |
| M12 | Acetone         | 1% PLGA               | 0                    | 60/4.5                          | 207.9 $\pm$ 7.5       | 0.32 $\pm$ 0.04      |
| M13 | DCM             | 1% PLGA               | 5                    | 60/4.5                          | 435.3 $\pm$ 20.3      | 0.37 $\pm$ 0.02      |
| M14 | EA              | 1% PLGA               | 5                    | 60/4.5                          | 356.0 $\pm$ 40.7      | 0.34 $\pm$ 0.02      |
| M15 | ACN             | 1% PLGA               | 5                    | 60/4.5                          | 154.0 $\pm$ 1.52      | 0.24 $\pm$ 0.01      |
| M16 | DCM             | 1% PLGA               | 10                   | 60/4.5                          | 453.6 $\pm$ 18.9      | 0.37 $\pm$ 0.10      |
| M17 | DCM             | 1% PLGA               | 20                   | 60/4.5                          | 583.6 $\pm$ 32.7      | 0.47 $\pm$ 0.06      |
| M18 | DCM             | 1% PLGA + 1% PEG-PLGA | 5                    | 60/4.5                          | 463.0 $\pm$ 17.6      | 0.30 $\pm$ 0.16      |

DCM, dichloromethane; EA, ethyl acetate; TFE, trifluoroethanol; DMF, dimethylformamide.

**Table S2.** Parameters of flow rate applied in the study.

| Flow rate              | 60/4.5 | 120/3 | 120/1 |
|------------------------|--------|-------|-------|
| Total Flow rate (mL/h) | 129    | 246   | 242   |
| Flow rate ratio        | 27:1   | 80:1  | 240:1 |

$$\text{Total Flow rate (mL/h)} = 2 \times (\text{Flow rate}_{\text{water}} + \text{Flow rate}_{\text{polymer}})$$

$$\text{Total Flow rate (mL/h)} = 2 \times (\text{Flow rate}_{\text{water}} + \text{Flow rate}_{\text{polymer}})$$
